# Supplementary material for: Ocimum Species: A Review on Chemical Constituents and Antibacterial Activity
Source: MDPI journal article supplement (doi:10.3390/molecules27196350), 2022-09-26
Supplement: s1 [file s1]

# *Ocimum* species: A Review on Chemical Constituents and Antibacterial Activity

Hendra Dian Adhita Dharsono <sup>1,\*</sup>, Salsabila Aqila Putri <sup>2</sup>, Dikdik Kurnia <sup>2</sup>, Dudi Dudi <sup>3</sup> and Mieke Hemiawati Satari <sup>4</sup>

<sup>1</sup> Department of Conservative Dentistry, Faculty of Dentistry, Universitas Padjadjaran, Sumedang 45363, West Java, Indonesia

<sup>2</sup> Department of Chemistry, Faculty of Mathematics and Natural Sciences, Universitas Padjadjaran, Sumedang 45363, West Java, Indonesia

<sup>3</sup> Department of Livestock Production, Faculty of Animal Husbandry, Universitas Padjadjaran; Sumedang 45363, West Java, Indonesia

<sup>4</sup> Department of Oral Biology, Faculty of Dentistry, Universitas Padjadjaran, Sumedang 45363, West Java, Indonesia

\* Correspondence: adhita.dharsono@fkg.unpad.ac.id; Tel.: +628156223343

## 2. Chemical Constituents and Antibacterial Activity of *Ocimum* Species

### 2.1. *Ocimum americanum*

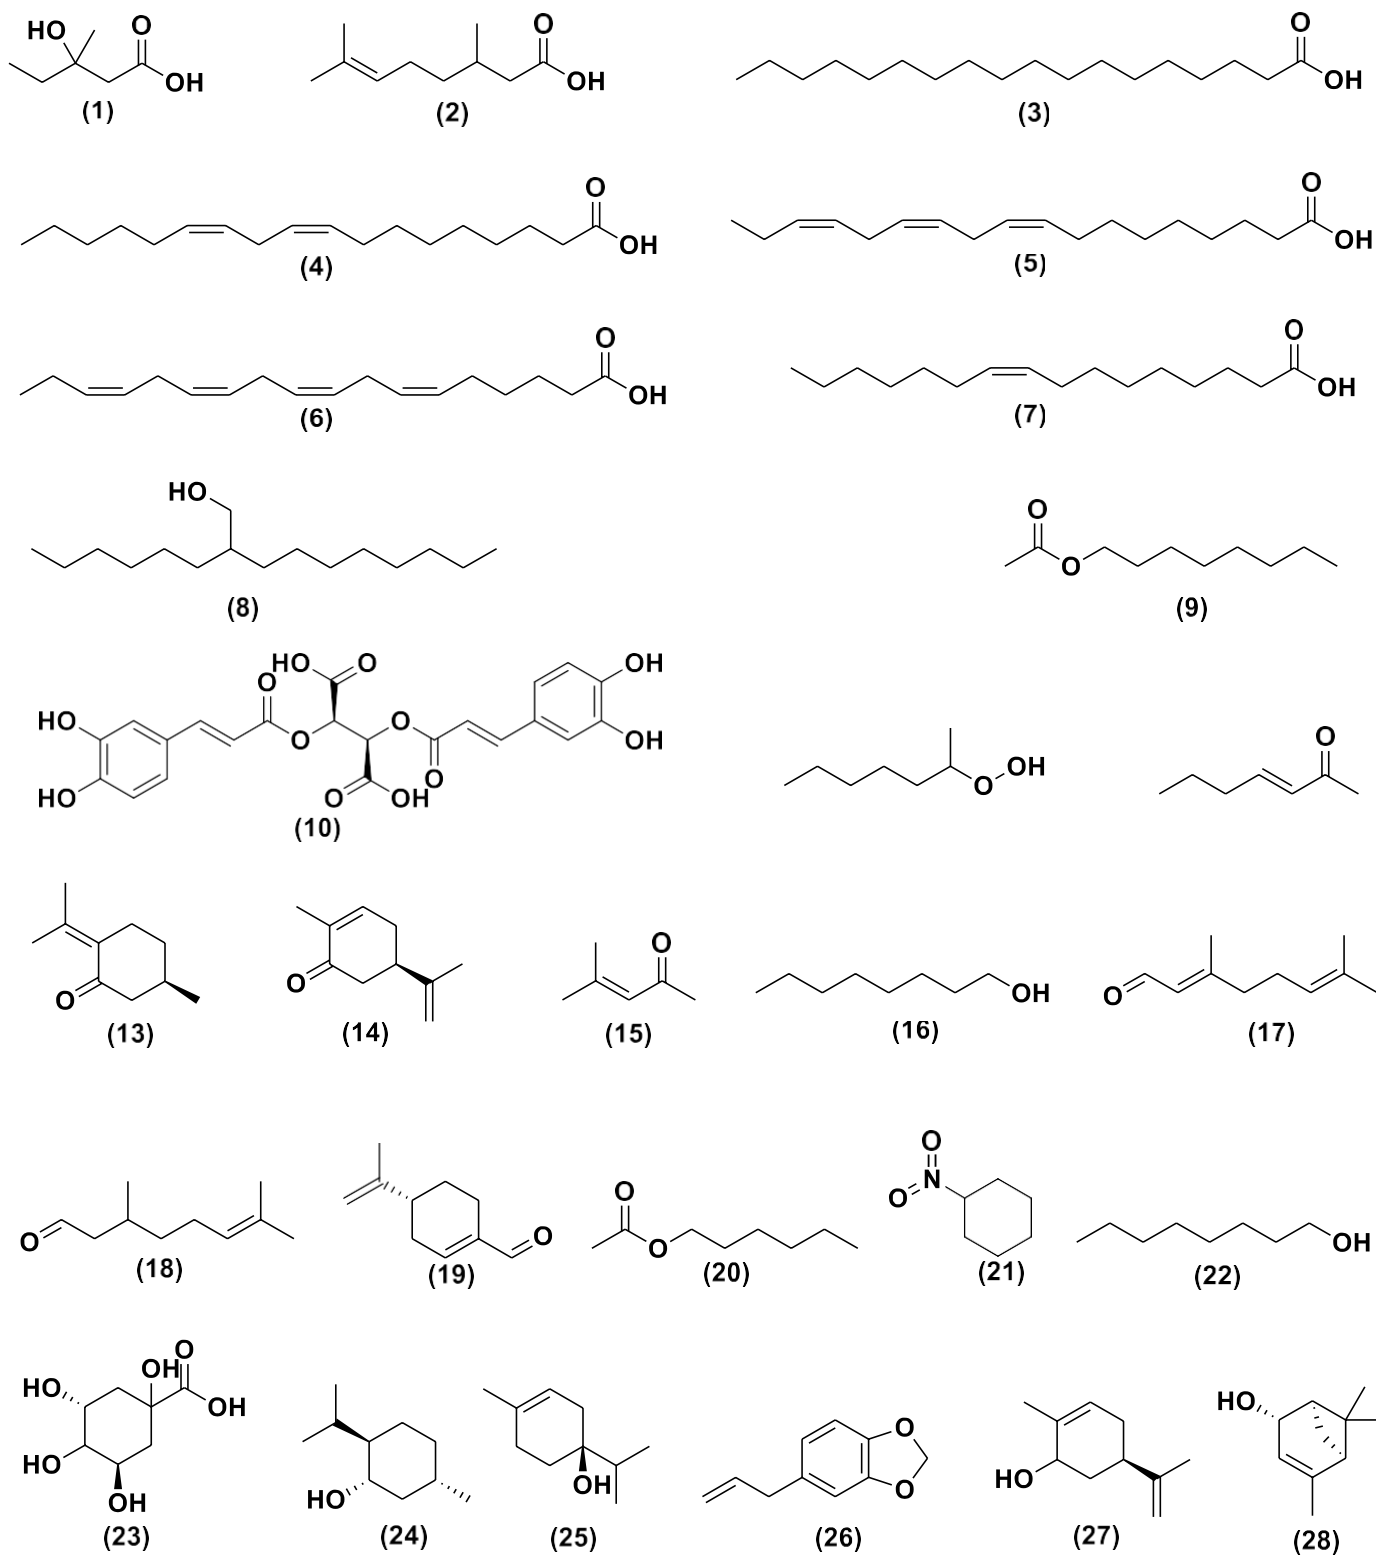

Figure S1. Cont.

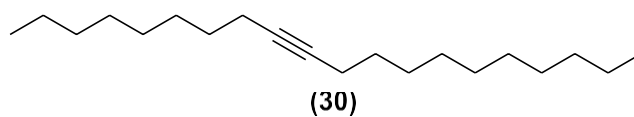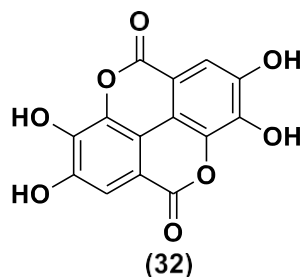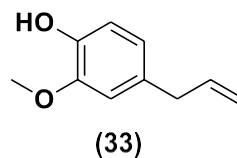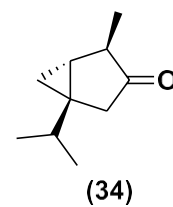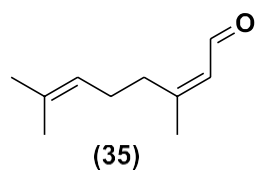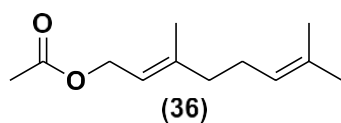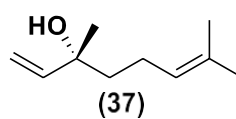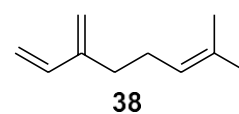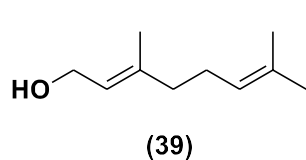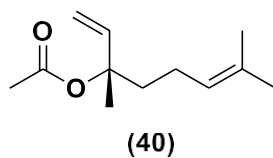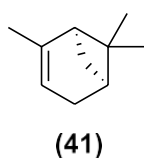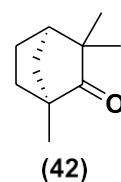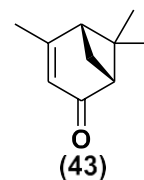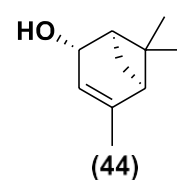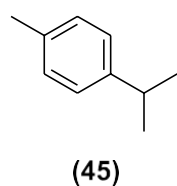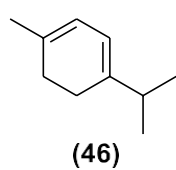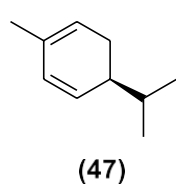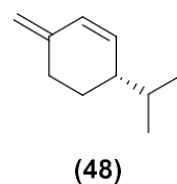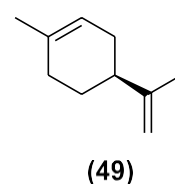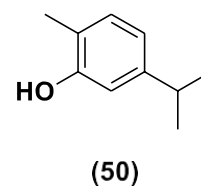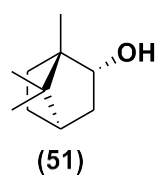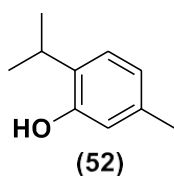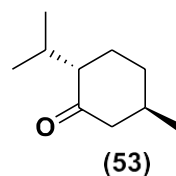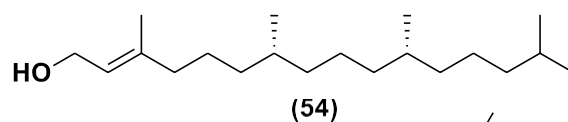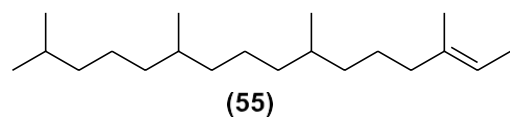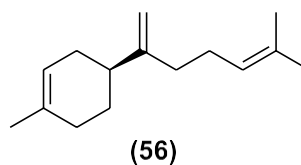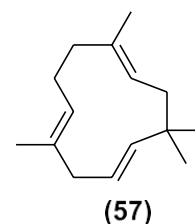

**Figure S1. Cont.**

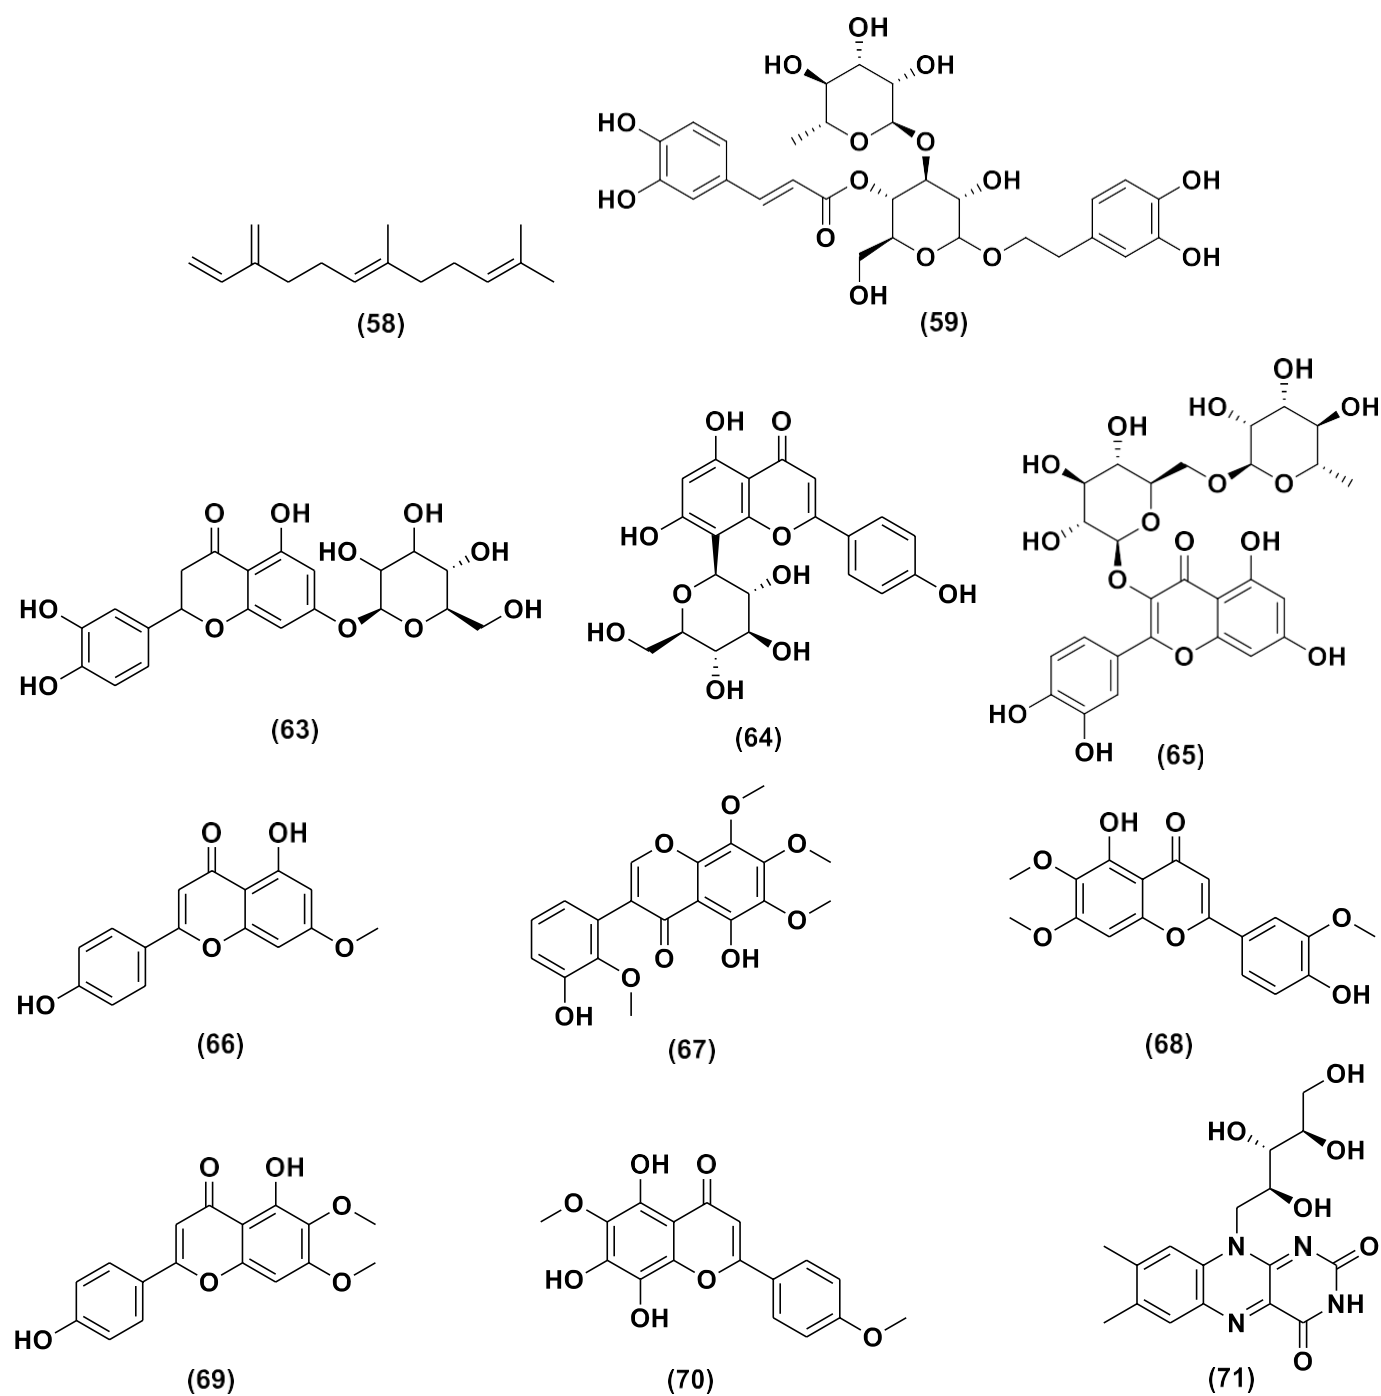Figure S1. Chemical Compound Structures of *O. americanum*

2.2. *Ocimum basilicum*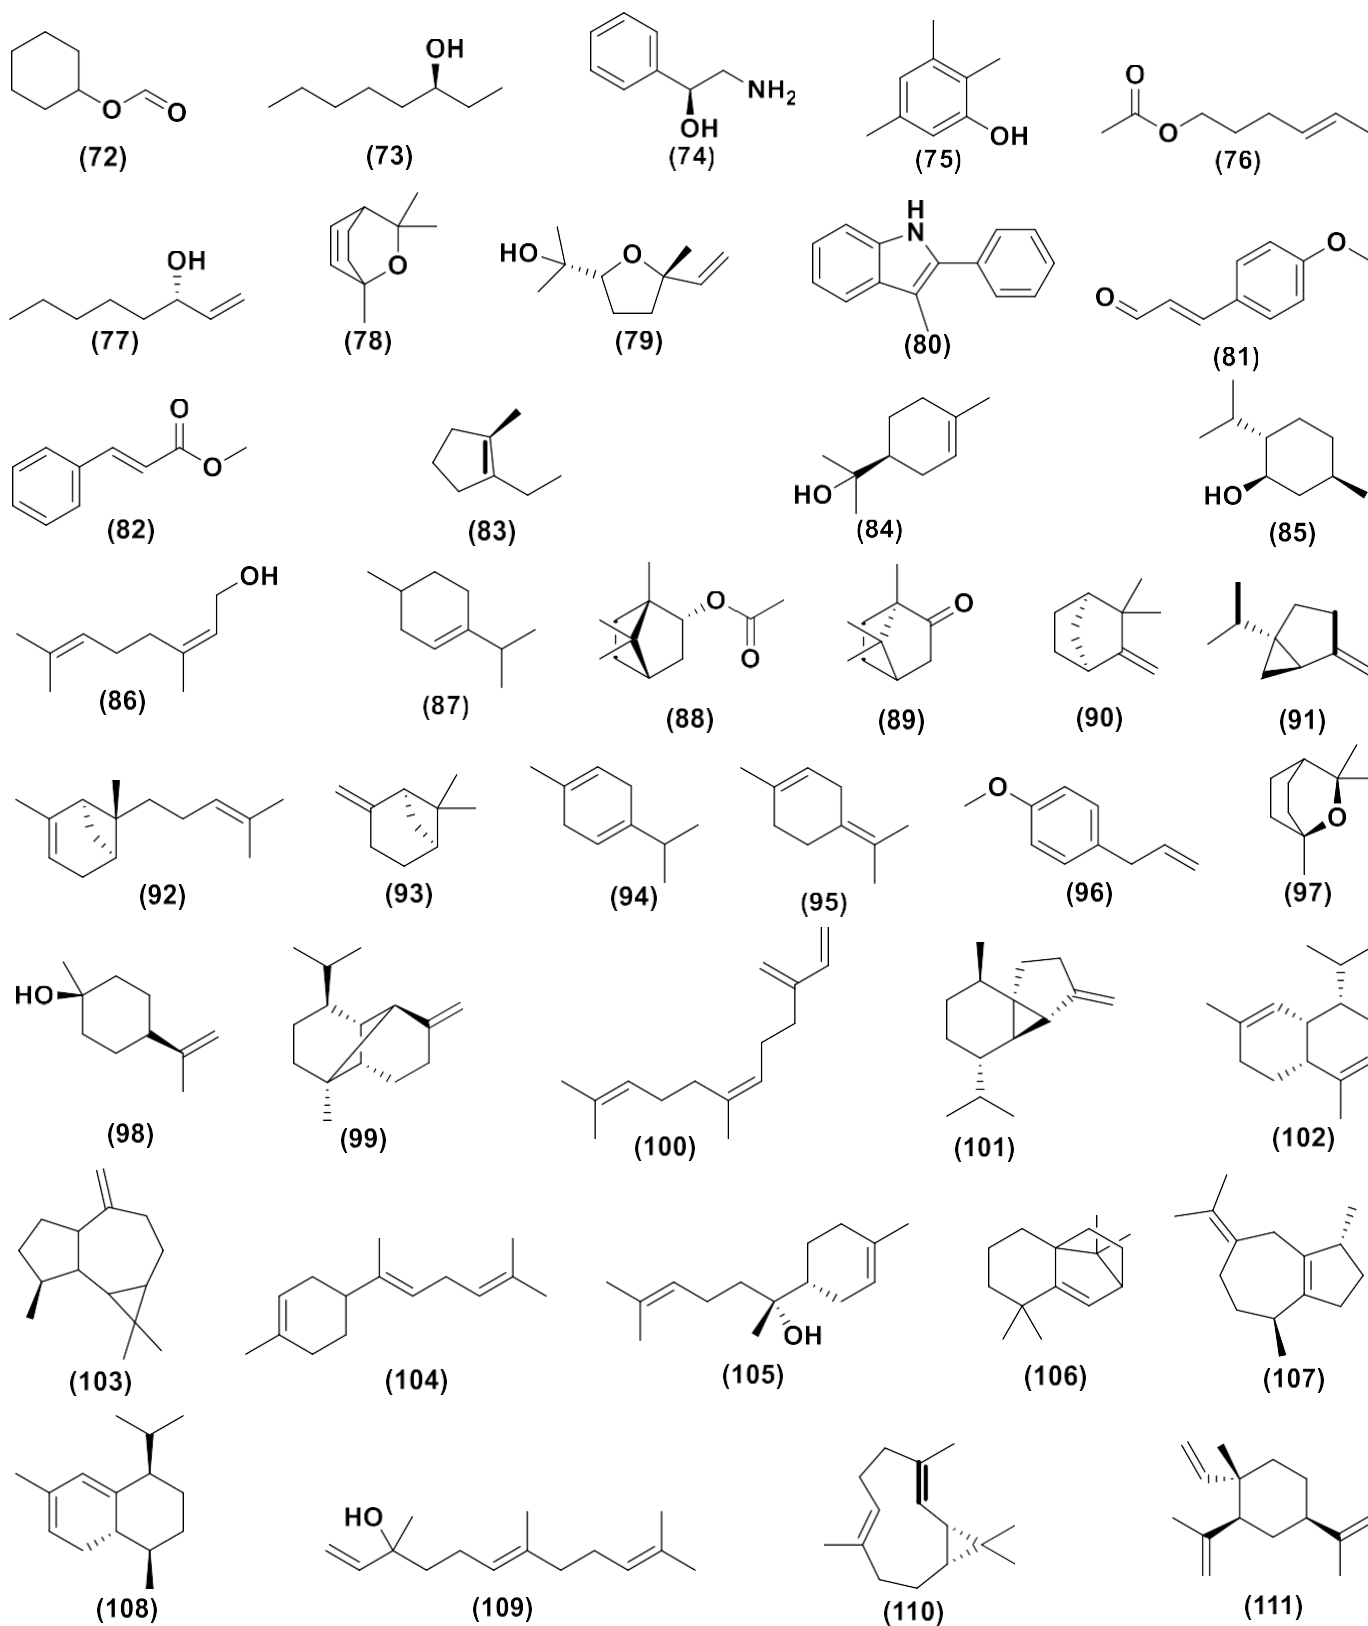

Figure S2. Cont.

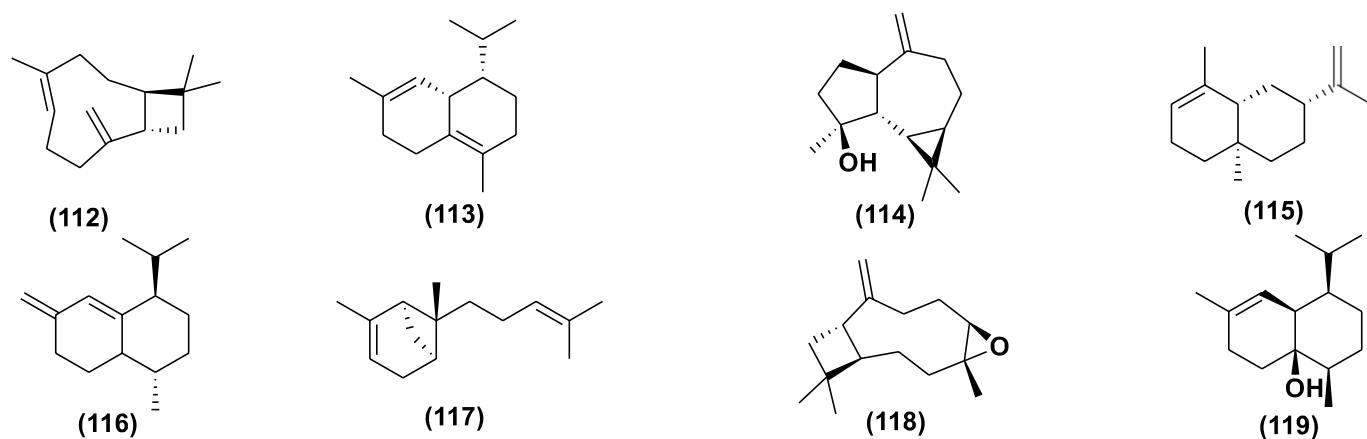Figure S2. Chemical Compound Structures of *O. basilicum*2.3. *Ocimum gratissimum*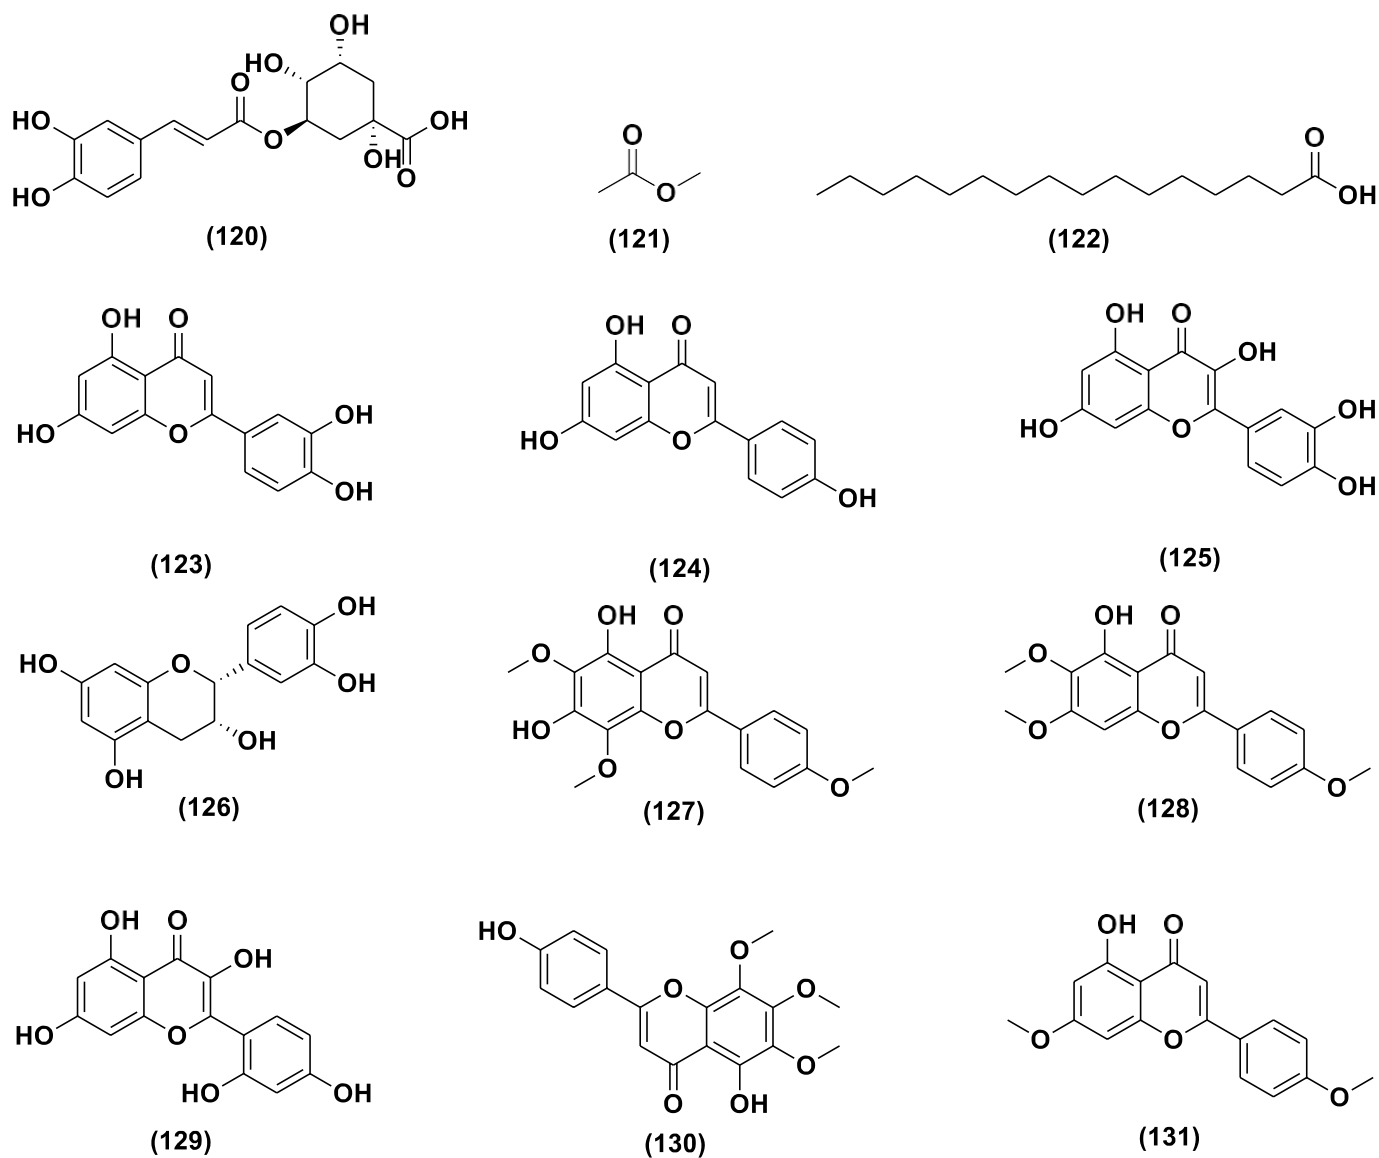

Figure S3. Cont.

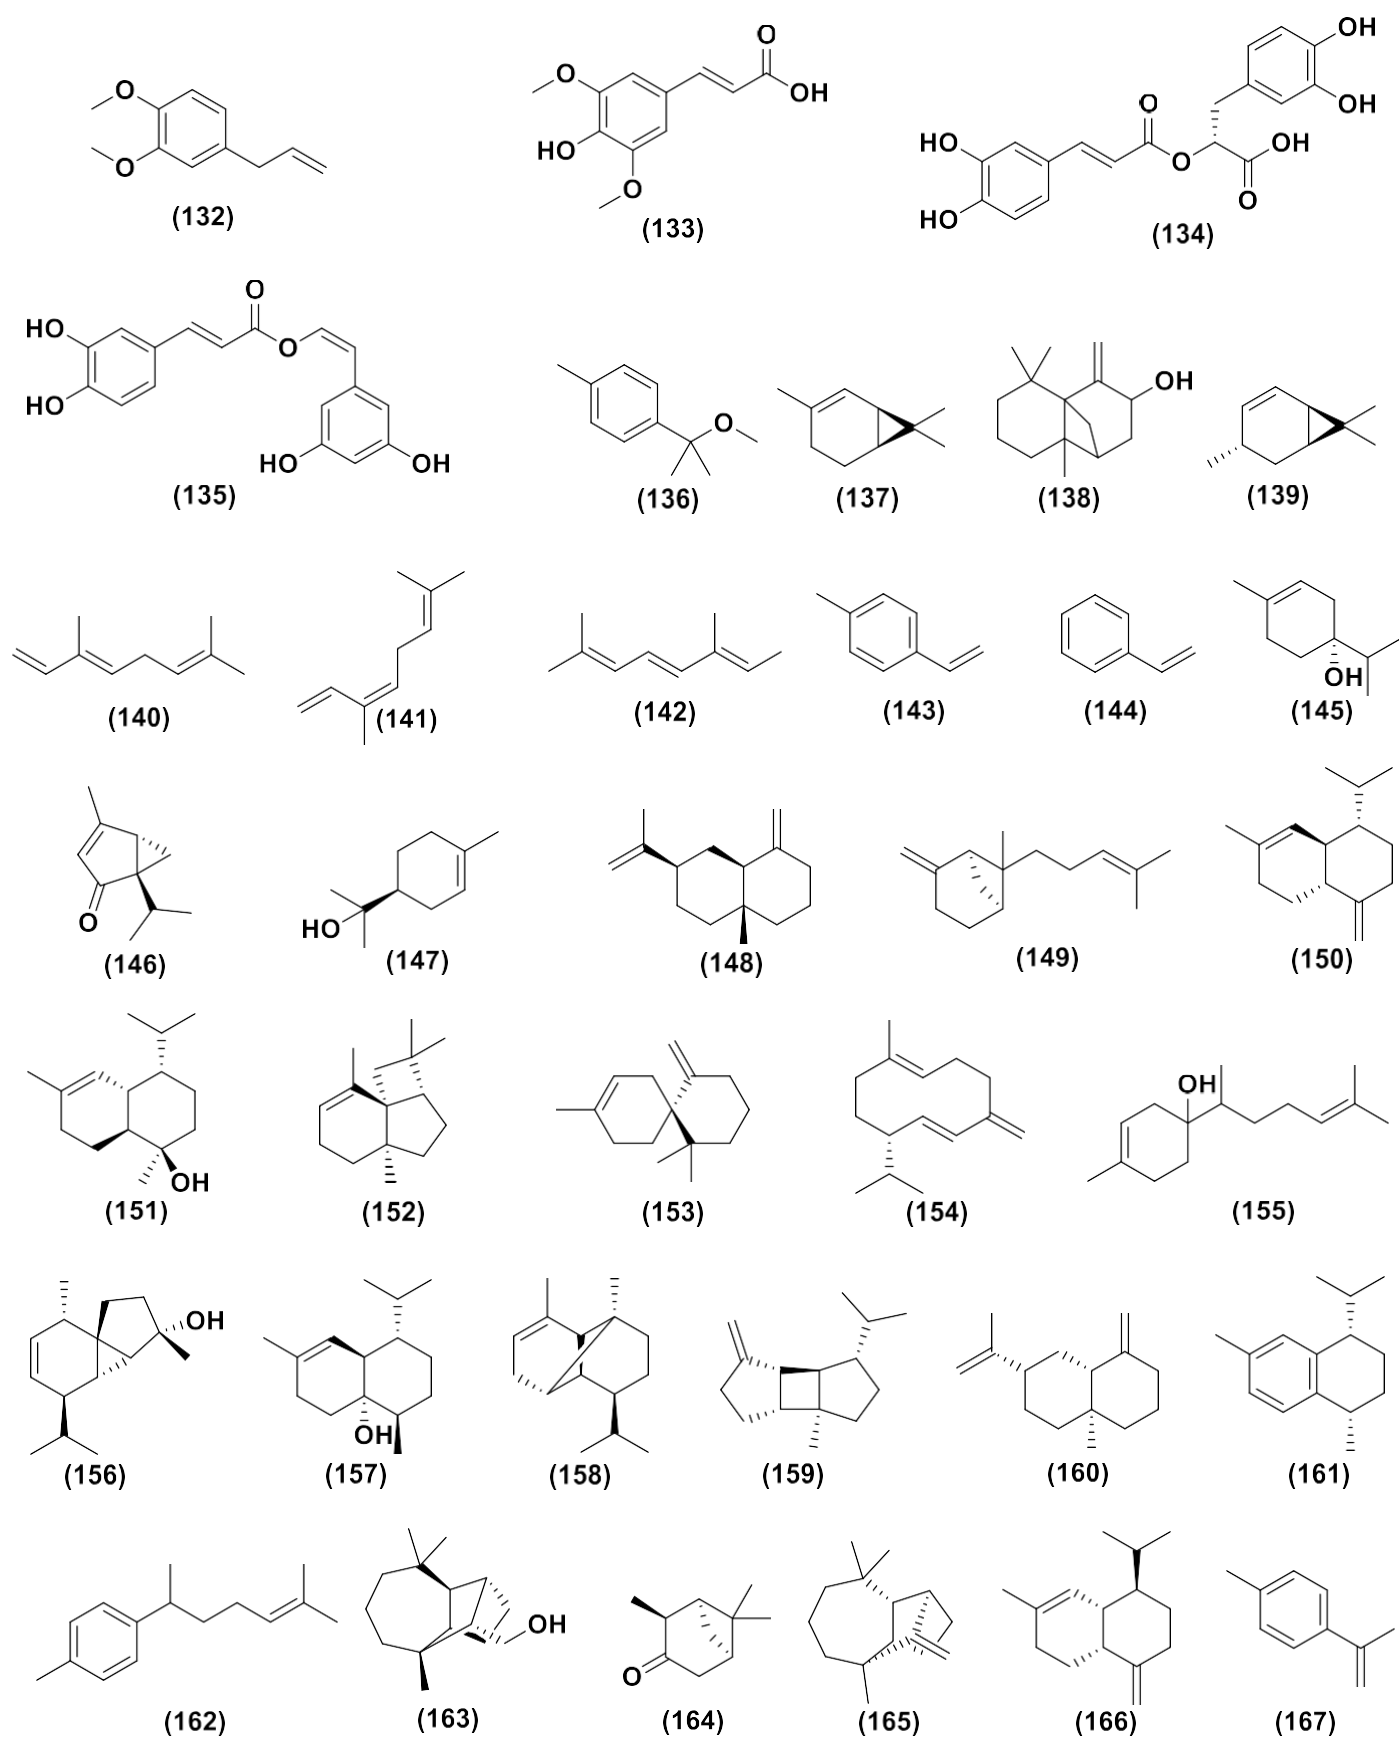

Figure S3. Cont.

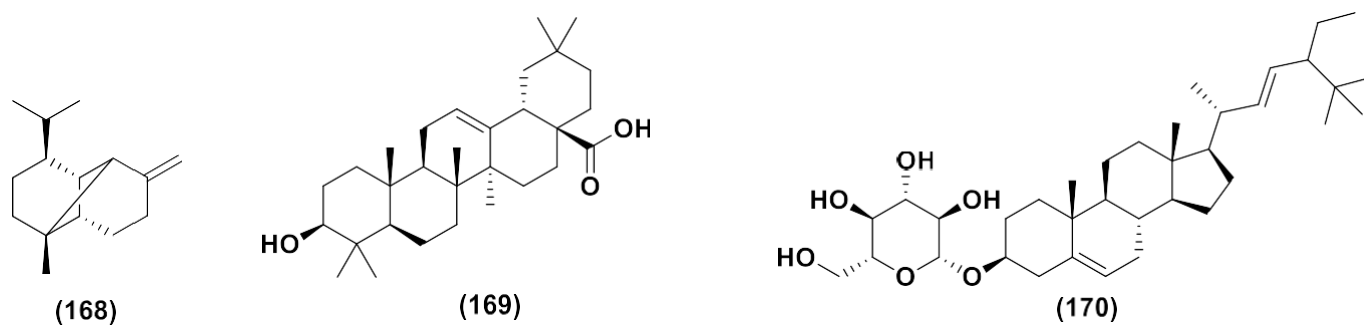Figure S3. Chemical Compound Structures of *O. gratissimum*2.4. *Ocimum campechianum*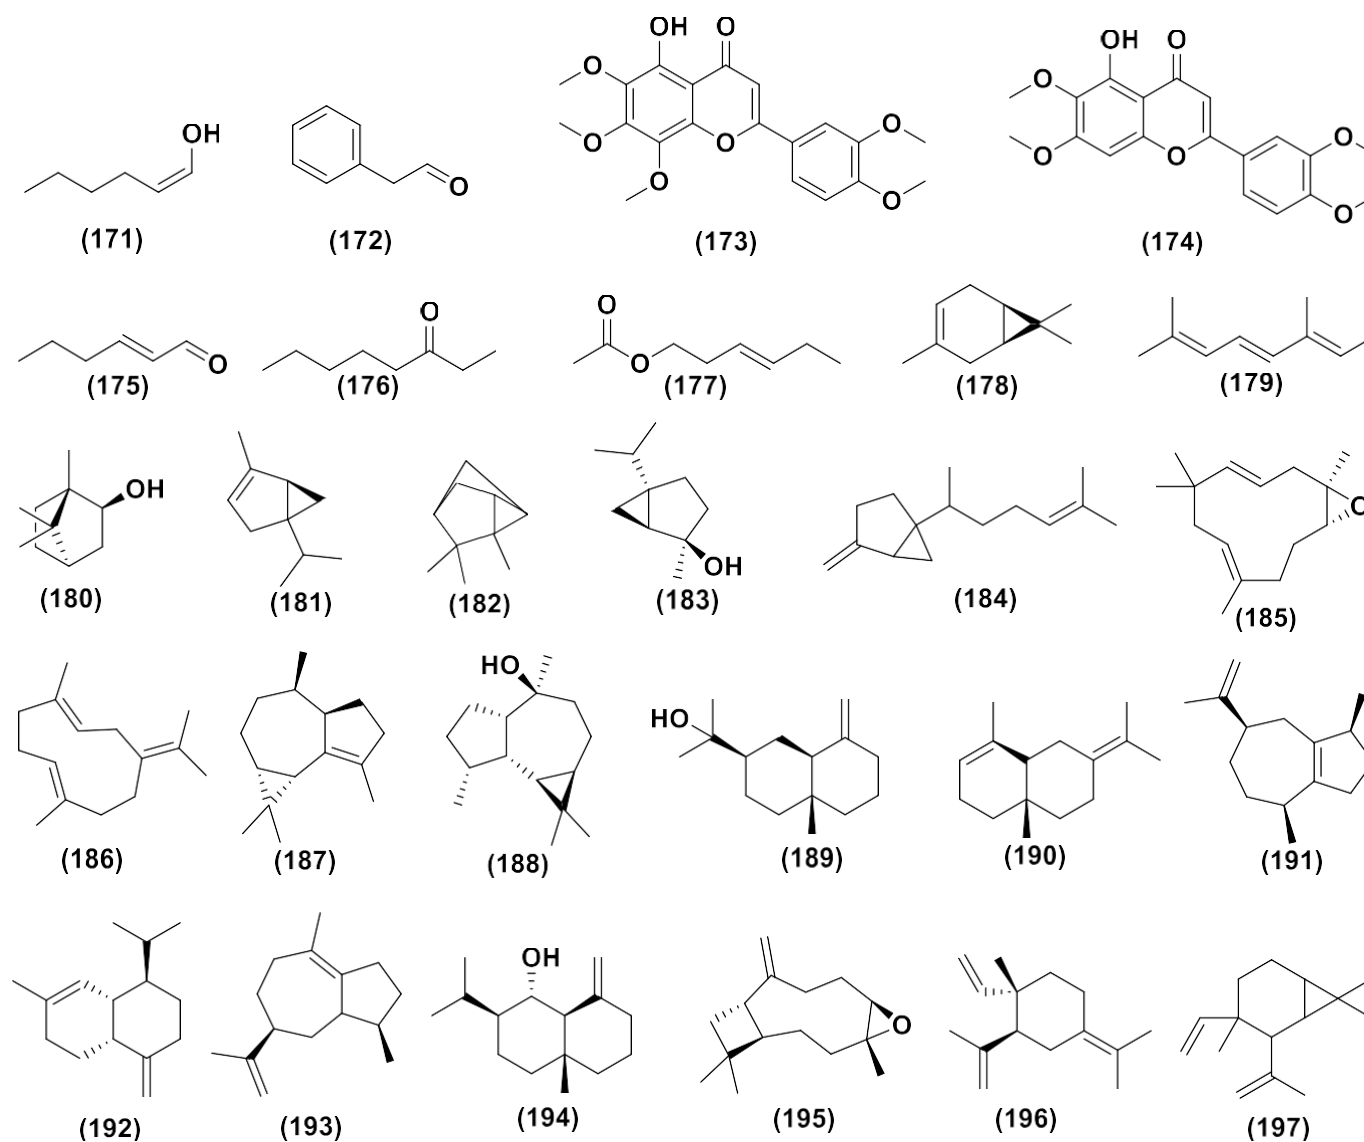Figure S4. Chemical Compound Structures of *O. campechianum*



2.5. *Ocimum sanctum*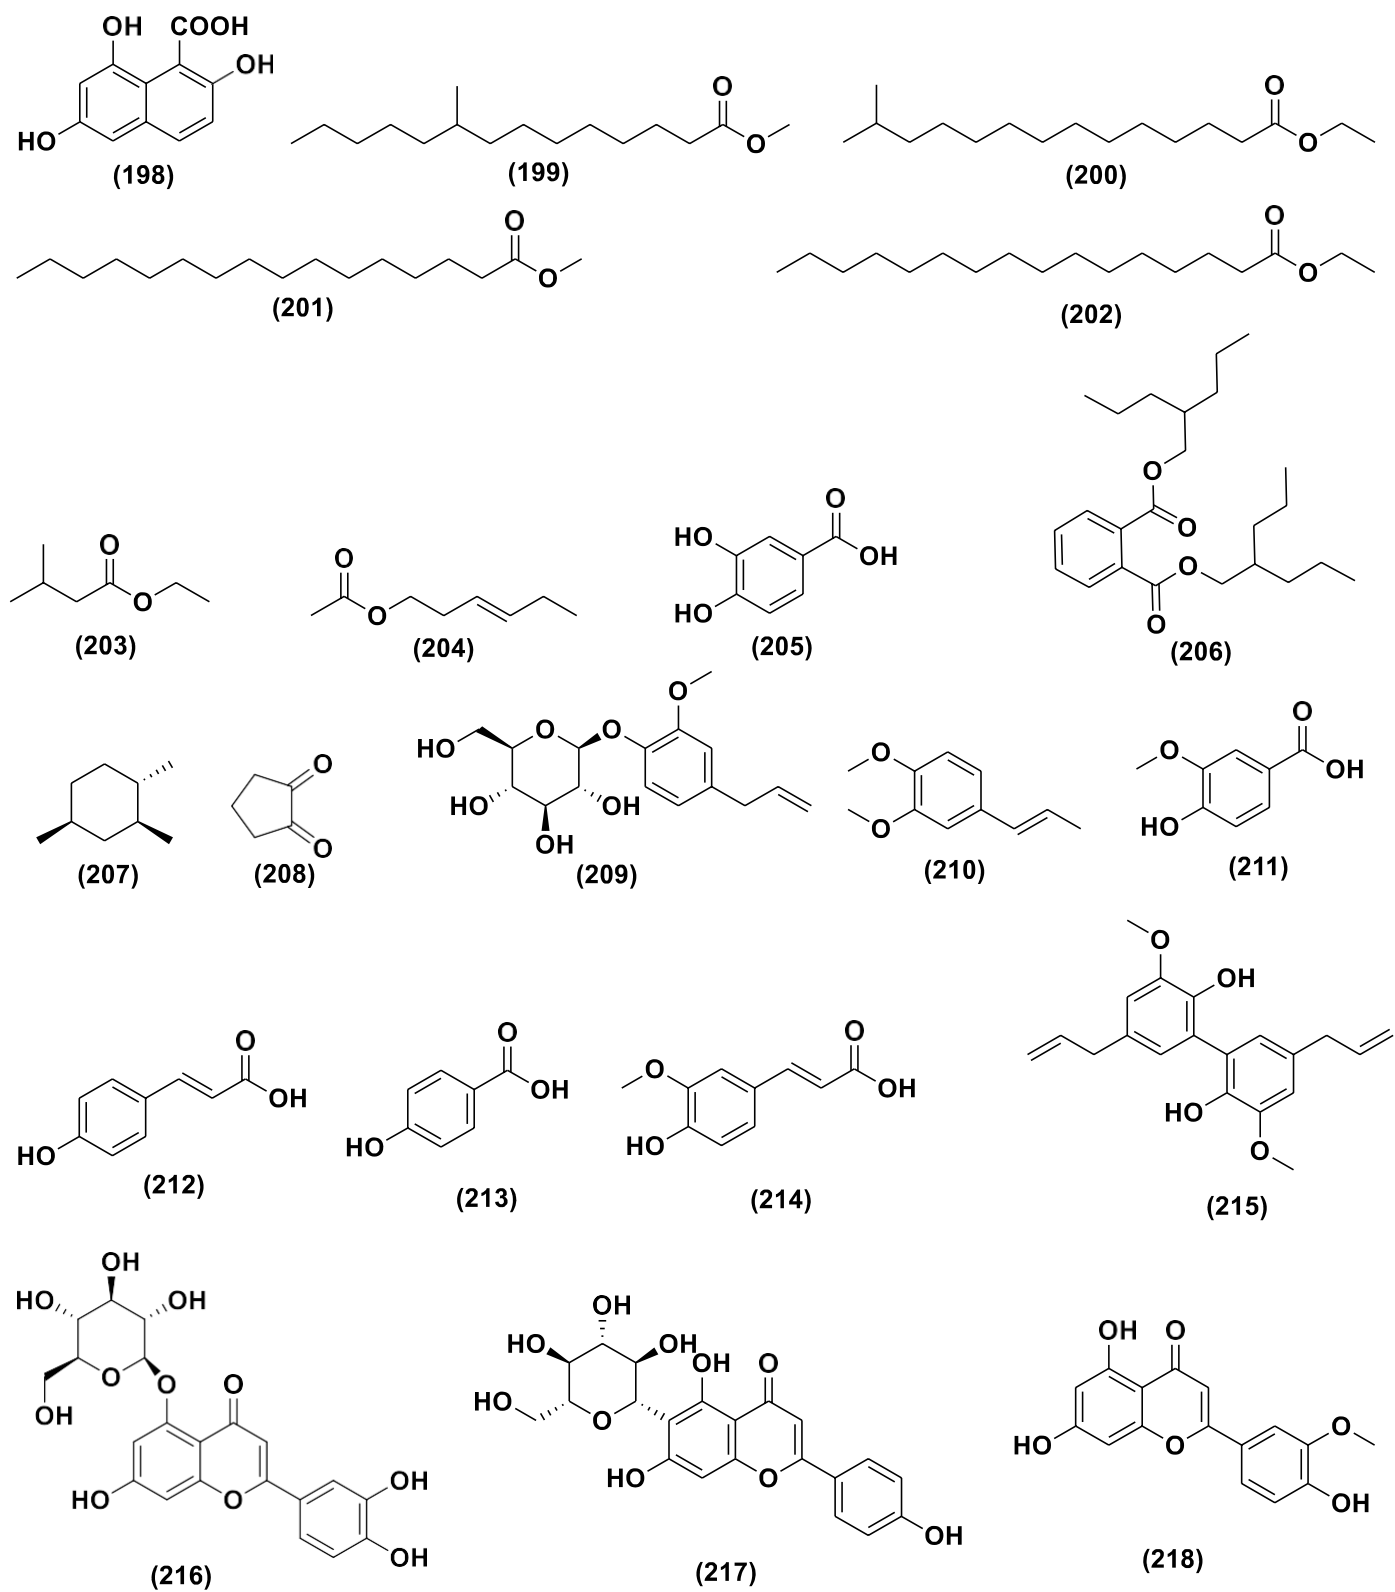

Figure S5. Cont.

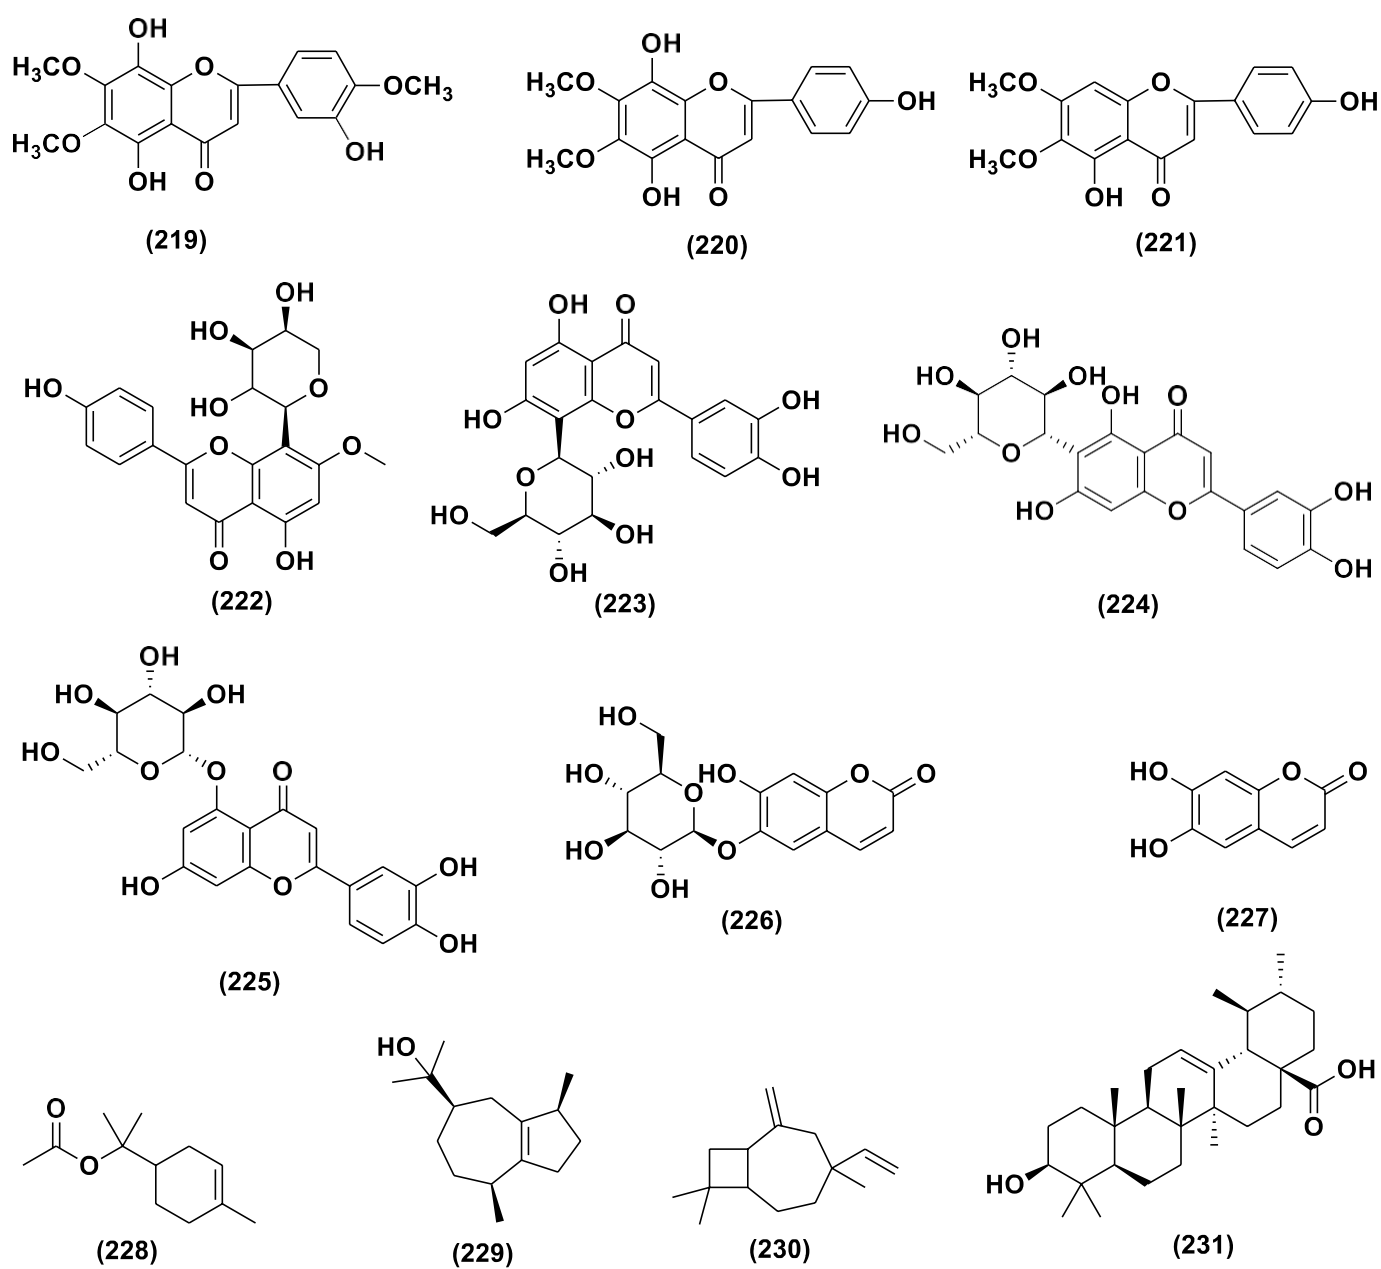Figure S5. Chemical Compound Structures of *O. sanctum*
